# Supplementary material for: π-Stacking of quinoid rings in crystals of alkali diaqua hydrogen chloranilates
Source: Royal Society of Chemistry journal article supplement (doi:10.1039/b821011j), 2009-01-01
Supplement: b821011j.pdf [file b821011j.pdf]

## **$\pi$ -Stacking of quinoid rings in crystals of alkali diaqua hydrogen chloranilates**

**Krešimir Molčanov,<sup>a</sup> Biserka Kojić-Prodić<sup>\*a</sup> and Anton Meden<sup>b</sup>**

<sup>a</sup>Rudjer Bošković Institute, POB 180, 10002 Zagreb, Croatia; E-mail: [kojic@irb.hr](mailto:kojic@irb.hr)

<sup>b</sup>Faculty of Chemistry and Chemical Technology, University of Ljubljana, Slovenia

### **Supplement data**

#### **Contents**

- S1 ORTEP drawings of hydrogen chloranilate and chloranilate anions**
- S2 Coordination geometries of alkali cations**
- S3 ORTEP drawings of alkali cation coordination spheres**
- S4 Geometric parameters of hydrogen bonds in [Na<sub>5</sub>HCA(CA)<sub>2</sub>(H<sub>2</sub>O)<sub>10</sub>]**

### S1 ORTEP drawings of hydrogen chloranilate and chloranilate anions

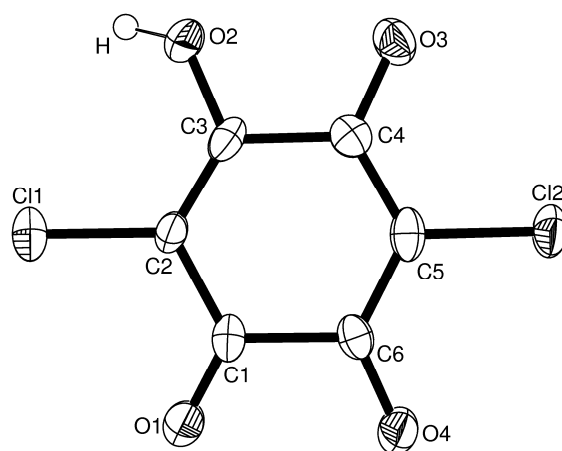

**Figure S1.1** ORTEP-3 drawing of hydrogen chloranilate ion in [LiHCAEtOH]. Atomic displacement ellipsoids are drawn at the 50% probability level and hydrogen atom has been depicted as a sphere of an arbitrary radius.

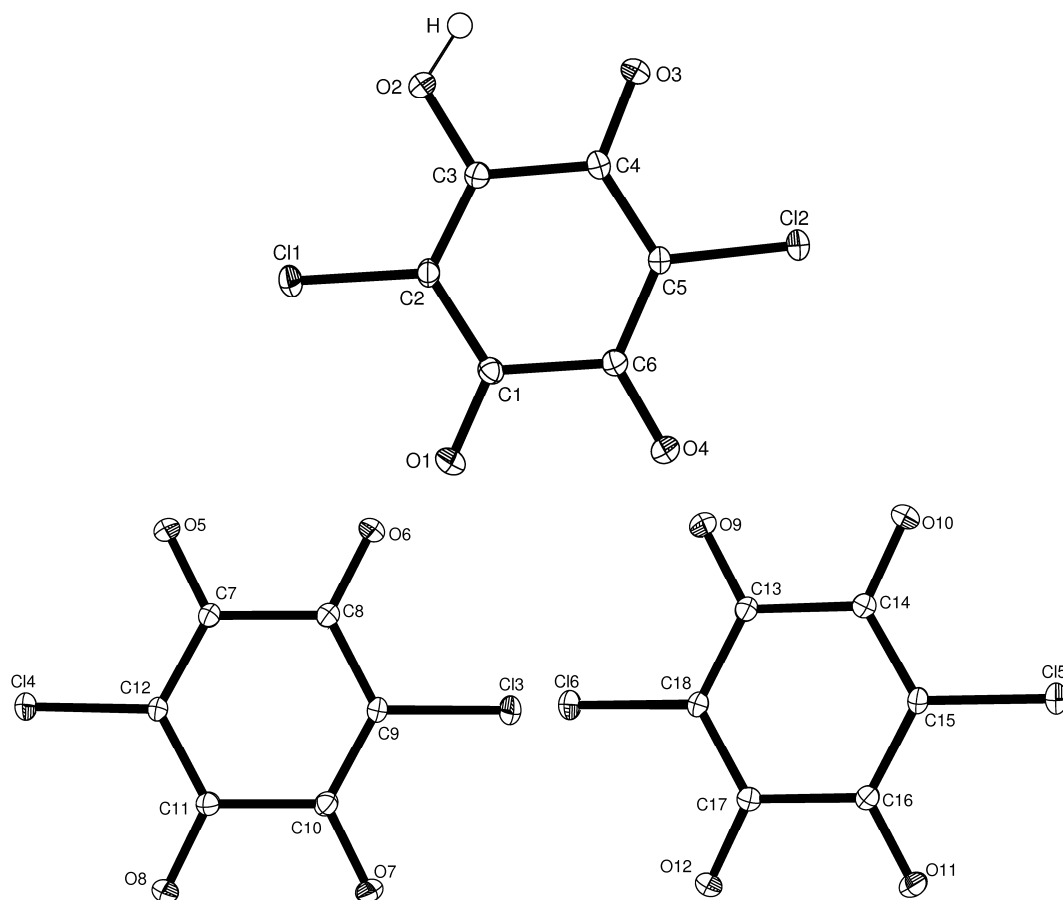

**Figure S1.2** ORTEP-3 drawing of hydrogen chloranilate and chloranilate ions in [Na<sub>5</sub>HCA(CA)<sub>2</sub>(H<sub>2</sub>O)<sub>10</sub>]. Atomic displacement ellipsoids are drawn at the 50%

probability level and hydrogen atom has been depicted as a sphere of an arbitrary radius.

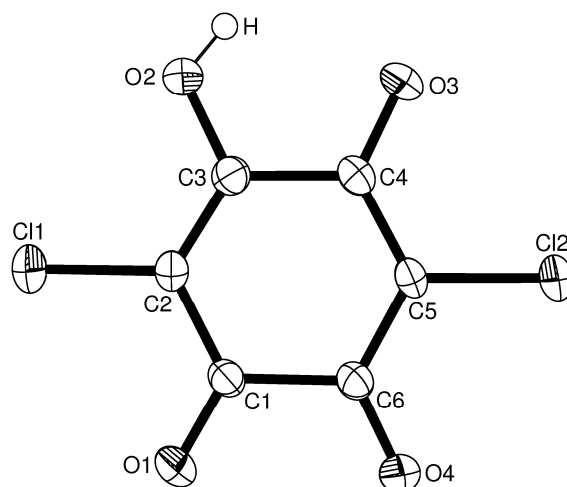

**Figure S1.3** ORTEP-3 drawing of hydrogen chloranilate ion in  $[\text{KHCA}(\text{H}_2\text{O})_2]$ . Atomic displacement ellipsoids are drawn at the 50% probability level and hydrogen atom has been depicted as a sphere of an arbitrary radius.

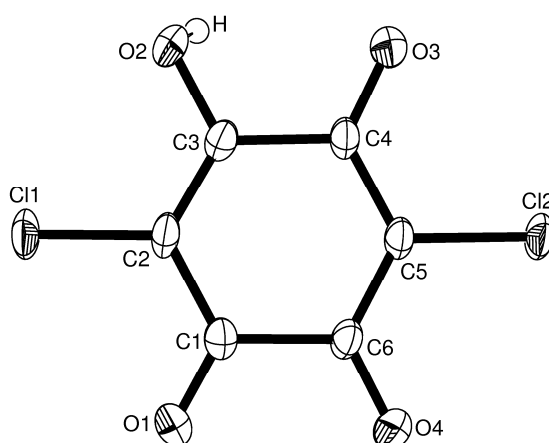

**Figure S1.4** ORTEP-3 drawing of hydrogen chloranilate ion in  $[\text{RbHCA}(\text{H}_2\text{O})_2]$ . Atomic displacement ellipsoids are drawn at the 50% probability level and hydrogen atom has been depicted as a sphere of an arbitrary radius.

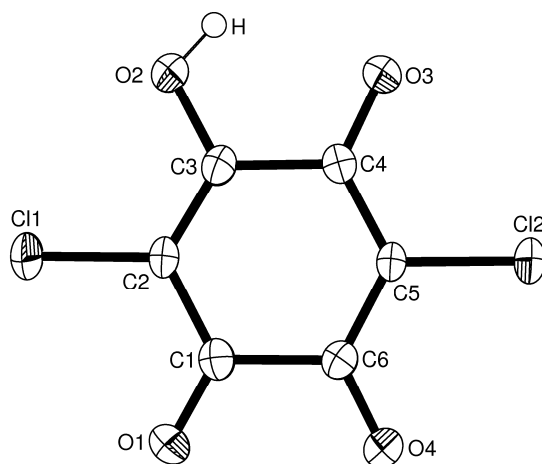

**Figure S1.5** ORTEP-3 drawing of hydrogen chloranilate ion in  $[\text{CsHCA}(\text{H}_2\text{O})_2]$ . Atomic displacement ellipsoids are drawn at the 50% probability level and hydrogen atom has been depicted as a sphere of an arbitrary radius.

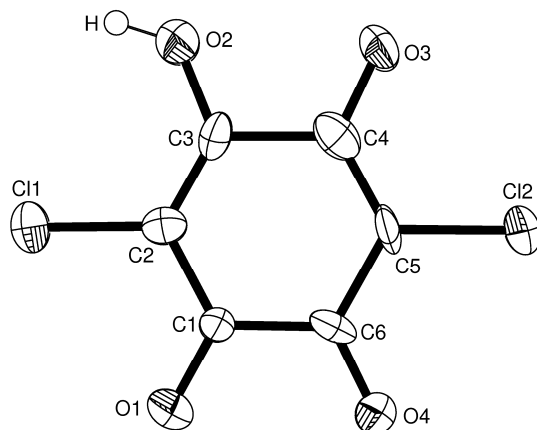

**Figure S1.6** ORTEP-3 drawing of hydrogen chloranilate ion in  $\text{NH}_4\text{HCA}\cdot 2\text{H}_2\text{O}$ . Atomic displacement ellipsoids are drawn at the 50% probability level and hydrogen atom has been depicted as a sphere of an arbitrary radius.

## S2 Coordination geometries of alkali cations

**Table S2.1** Geometric parameters of lithium coordination sphere (Å). Coordination polyhedron is a tetragonal pyramid.

|                              |           |          |
|------------------------------|-----------|----------|
| Li1 – O1                     | (HCA)     | 2.09(1)  |
| Li1 – O2 <sup><i>i</i></sup> | (HCA)     | 2.10(1)  |
| Li1 – O3 <sup><i>i</i></sup> | (HCA)     | 2.00(1)  |
| Li1 – O4                     | (HCA)     | 2.05(1)  |
| Li1 – O5                     | (ethanol) | 2.002(8) |

Symmetry code: *i*) 1–*x*, 1–*y*, ½+*z*.

**Table S2.2** Geometric parameters of sodium coordination spheres (Å). Coordination polyhedra are distorted octahedra.

| Na1                      |         |           |
|--------------------------|---------|-----------|
| Na1 – O1                 | (HCA)   | 2.533(1)  |
| Na1 – O20                | (water) | 2.370(1)  |
| Na1 – O21                | (water) | 2.374(1)  |
| Na1 – O22                | (water) | 2.323(1)  |
| Na1 – O4                 | (HCA)   | 2.425(1)  |
| Na1 – O6                 | (CA)    | 2.379(1)  |
| Na2                      |         |           |
| Na2 – O1                 | (HCA)   | 2.361(1)  |
| Na2 – O23                | (water) | 2.507(1)  |
| Na2 – O24                | (water) | 2.371(1)  |
| Na2 – O5                 | (CA)    | 2.375(1)  |
| Na2 – O6                 | (CA)    | 2.380(1)  |
| Na2 – O8 <sup>i</sup>    | (CA)    | 2.603(1)  |
| Na3                      |         |           |
| Na3 – Cl3 <sup>ii</sup>  | (CA)    | 3.0000(7) |
| Na3 – O23                | (water) | 2.372(1)  |
| Na3 – O24                | (water) | 2.399(1)  |
| Na3 – O25                | (water) | 2.406(1)  |
| Na3 – O26                | (water) | 2.331(1)  |
| Na3 – O7 <sup>ii</sup>   | (CA)    | 2.343(1)  |
| Na4                      |         |           |
| Na4 – Cl6                | (CA)    | 3.1400(7) |
| Na4 – O25                | (water) | 2.383(1)  |
| Na4 – O26                | (water) | 2.392(1)  |
| Na4 – O27                | (water) | 2.338(1)  |
| Na4 – O28                | (water) | 2.390(1)  |
| Na4 – O9                 | (CA)    | 2.330(1)  |
| Na5                      |         |           |
| Na5 – O11 <sup>ii</sup>  | (CA)    | 2.408(1)  |
| Na5 – O12 <sup>ii</sup>  | (CA)    | 2.398(1)  |
| Na5 – O12 <sup>iii</sup> |         | 2.316(1)  |
| Na5 – O27                | (water) | 2.404(1)  |
| Na5 – O28                | (water) | 2.379(1)  |
| Na5 – O29                | (water) | 2.484(1)  |

Symmetry codes: *i*) 2–*x*, 2–*y*, –*z*; *ii*) –1+*x*, *y*, *z*; *iii*) 1–*x*, 3–*y*, –*z*.

**Table S2.3** Geometric parameters of potassium coordination sphere (Å). Coordination polyhedron is tricapped trigonal prism (6+3).

|                         |         |          |
|-------------------------|---------|----------|
| K1 – Cl1 <sup>i</sup>   | (HCA)   | 3.583(1) |
| K1 – Cl2 <sup>ii</sup>  | (HCA)   | 3.335(1) |
| K1 – Cl2 <sup>iii</sup> |         | 3.511(1) |
| K1 – O1                 | (HCA)   | 2.912(2) |
| K1 – O1 <sup>i</sup>    |         | 2.842(2) |
| K1 – O3 <sup>ii</sup>   | (HCA)   | 2.919(2) |
| K1 – O4                 | (HCA)   | 2.693(2) |
| K1 – O5                 | (water) | 2.830(2) |
| K1 – O6                 | (water) | 2.830(3) |

Symmetry code: *i*)  $-x, 2-y, -z$ ; *ii*)  $-x, 1/2+y, 1/2-z$ ; *iii*)  $x, 3/2-y, -1/2+z$ .

**Table S2.4** Geometric parameters of rubidium coordination sphere (Å). Coordination polyhedron is a mono-capped pentagonal bipyramid (7+1).

|                         |         |          |
|-------------------------|---------|----------|
| Rb1 – Cl1 <sup>i</sup>  | (HCA)   | 3.508(3) |
| Rb1 – O1                | (HCA)   | 3.131(3) |
| Rb1 – O1 <sup>i</sup>   |         | 2.990(3) |
| Rb1 – O2 <sup>ii</sup>  | (HCA)   | 3.134(3) |
| Rb1 – O3 <sup>iii</sup> | (HCA)   | 3.438(4) |
| Rb1 – O4                | (HCA)   | 2.859(3) |
| Rb1 – O5                | (water) | 2.986(5) |
| Rb1 – O6                | (water) | 2.934(4) |

Symmetry code: *i*)  $1-x, -y, 1-z$ ; *ii*)  $-1/2+x, 1/2-y, -1/2+z$ ; *iii*)  $2-x, -y, 1-z$ .

**Table S2.5** Geometric parameters of caesium coordination sphere (Å). Coordination polyhedron is a mono-capped pentagonal bipyramid (7+1).

|                         |         |           |
|-------------------------|---------|-----------|
| Cs1 – Cl1 <sup>i</sup>  | (HCA)   | 3.6498(8) |
| Cs1 – O1                | (HCA)   | 3.247(2)  |
| Cs1 – O1 <sup>i</sup>   |         | 3.155(2)  |
| Cs1 – O2 <sup>ii</sup>  | (HCA)   | 3.214(2)  |
| Cs1 – O3 <sup>iii</sup> | (HCA)   | 3.447(2)  |
| Cs1 – O4                | (HCA)   | 3.023(2)  |
| Cs1 – O5                | (water) | 3.231(3)  |
| Cs1 – O6                | (water) | 3.140(3)  |

Symmetry code: *i*)  $2-x, 2-y, -z$ ; *ii*)  $1/2+x, 1/2-y, 1/2+z$ ; *iii*)  $1-x, 1-y, -z$ .

### S3 ORTEP drawings of alkali cation coordination spheres

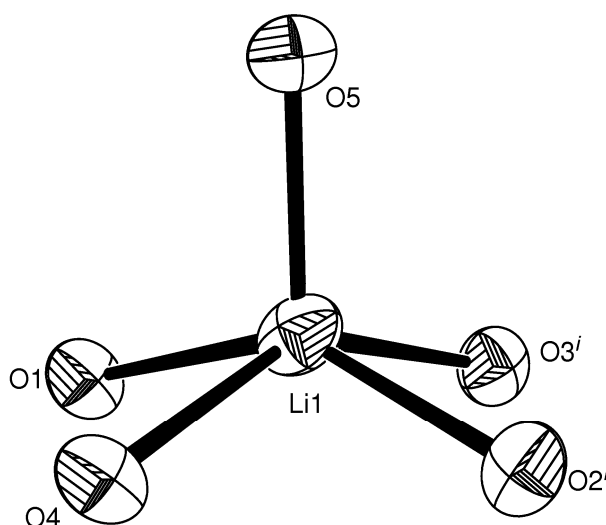

**Figure S3.1** ORTEP-3 drawing of coordination sphere of  $\text{Li}^+$  in  $[\text{LiHCAEtOH}]$ . Atomic displacement ellipsoids are drawn at the 50% probability level and hydrogen atoms have been depicted as a sphere of arbitrary radii. Symmetry code: *i*)  $1-x, 1-y, \frac{1}{2}+z$ .

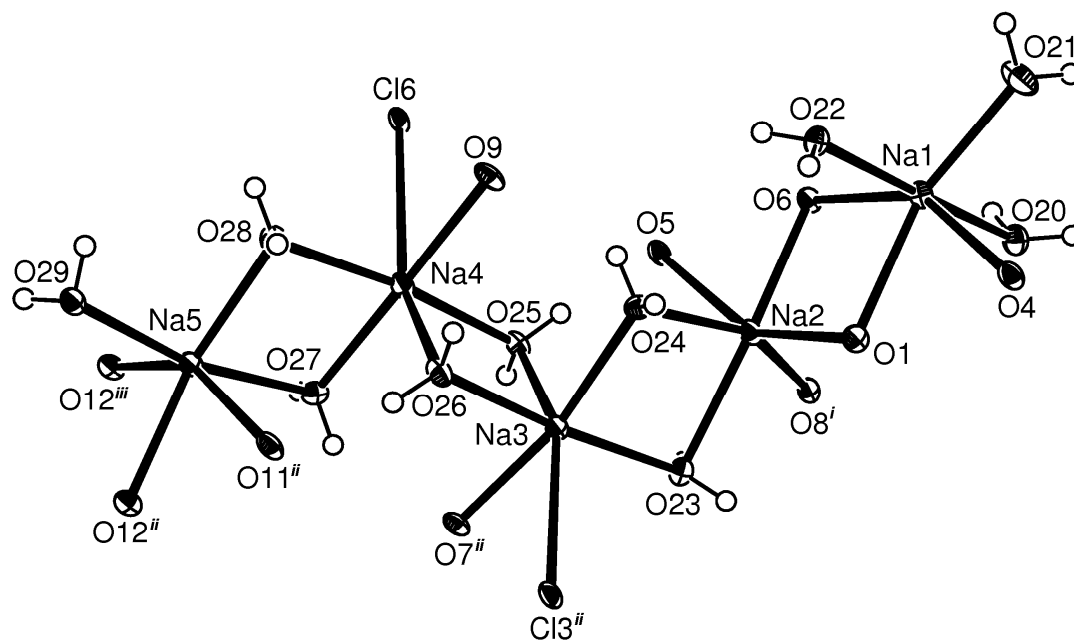

**Figure S3.2** ORTEP-3 drawings of coordinations spheres of  $\text{Na}^+$  in  $[\text{Na}_5\text{HCA}(\text{CA})_2(\text{H}_2\text{O})_{10}]$ . The common edges in pentameric octahedral ribbon are: O1 from  $\text{HCA}^-$  and O6 from  $\text{CA}^{2-}$  between Na1/Na2, whereas in the polyhedra Na2/Na3, Na3/Na4, and Na4/Na5 water molecules function as double bridges. Atomic displacement ellipsoids are drawn at 50% probability and hydrogen atoms have been depicted as a sphere of arbitrary radii. Symmetry code: *i*)  $2-x, 2-y, -z$ ; *ii*)  $-1+x, y, z$ ; *iii*)  $1-x, 3-y, -z$ .



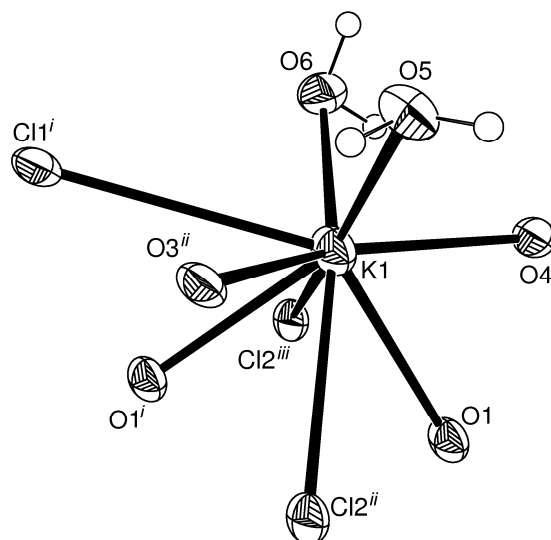

**Figure S3.3** ORTEP-3 drawing of coordination sphere of  $K^+$  in  $[KHCA(H_2O)_2]$ . Atomic displacement ellipsoids are drawn at the 50% probability level and hydrogen atoms have been depicted as a sphere of arbitrary radii. Symmetry code: *i*)  $-x, 2-y, -z$ ; *ii*)  $-x, 1/2+y, 1/2-z$ ; *iii*)  $x, 3/2-y, -1/2+z$ .

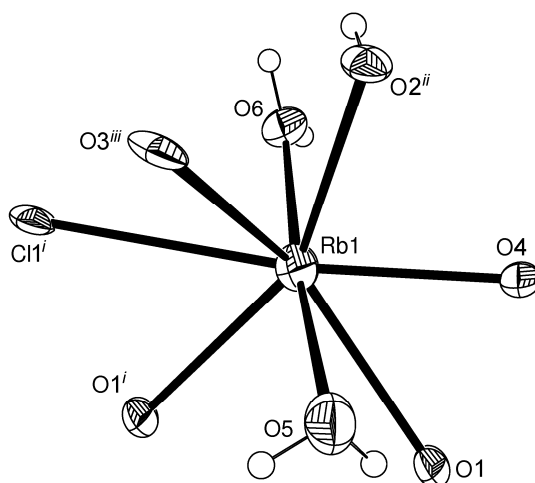

**Figure S3.4** ORTEP-3 drawing of coordination sphere of  $Rb^+$  in  $[RbHCA(H_2O)_2]$ . Atomic displacement ellipsoids are drawn at the 50% probability level and hydrogen atoms have been depicted as a sphere of arbitrary radii. Symmetry code: *i*)  $1-x, -y, 1-z$ ; *ii*)  $-1/2+x, 1/2-y, -1/2+z$ ; *iii*)  $2-x, -y, 1-z$ .

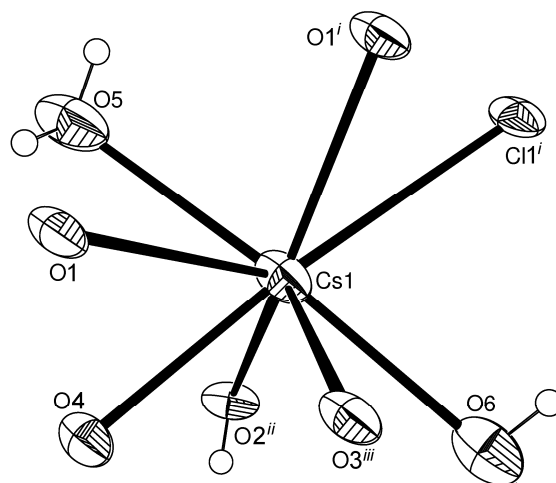

**Figure S3.5** ORTEP-3 drawing of coordination sphere of Cs<sup>+</sup> in [CsHCA(H<sub>2</sub>O)<sub>2</sub>]. Atomic displacement ellipsoids are drawn at the 50% probability level and hydrogen atoms have been depicted as a sphere of arbitrary radii. Symmetry code: *i*) 2-x, 2-y, -z; *ii*) 1/2+x, 1/2-y, 1/2+z; *iii*) 1-x, 1-y, -z.

**S4 Geometric parameters of hydrogen bonds in [Na<sub>5</sub>HCA(CA)<sub>2</sub>(H<sub>2</sub>O)<sub>10</sub>]**

**Table S4.1** Geometric parameters of hydrogen bonds in [Na<sub>5</sub>HCA(CA)<sub>2</sub>(H<sub>2</sub>O)<sub>10</sub>].

|                       | $d(D-H)/\text{\AA}$ | $d(H\cdots A)/\text{\AA}$ | $d(D\cdots A)/\text{\AA}$ | $D-H\cdots A/^\circ$ | Symm. operation on <i>A</i> |
|-----------------------|---------------------|---------------------------|---------------------------|----------------------|-----------------------------|
| O2-H $\cdots$ O29     | 0.88(2)             | 2.27(2)                   | 2.657(1)                  | 106(2)               | $-x, 2-y, 1-z$              |
| O20-H20A $\cdots$ O4  | 0.90(2)             | 1.92(2)                   | 2.817(1)                  | 170(2)               | $2-x, 2-y, 1-z$             |
| O20-H20B $\cdots$ Cl1 | 0.92(2)             | 2.73(2)                   | 3.311(1)                  | 122(1)               | $2-x, 2-y, 1-z$             |
| O20-H20B $\cdots$ Cl4 | 0.92(2)             | 2.67(2)                   | 3.360(1)                  | 132(1)               | $2-x, 2-y, z$               |
| O21-H21A $\cdots$ O2  | 0.89(3)             | 2.32(2)                   | 3.014(2)                  | 147(2)               | $1+x, y, z$                 |
| O21-H21B $\cdots$ O11 | 0.88(3)             | 2.22(3)                   | 2.949(1)                  | 139(2)               | $2-x, 2-y, 1-z$             |
| O22-H22A $\cdots$ O9  | 0.89(2)             | 1.93(2)                   | 2.784(1)                  | 158(2)               | $1-x, 2-y, 1-z$             |
| O22-H22B $\cdots$ O10 | 0.90(1)             | 1.97(1)                   | 2.861(1)                  | 168(2)               | $x, y, z$                   |
| O23-H23A $\cdots$ O2  | 0.87(1)             | 2.18(1)                   | 3.009(1)                  | 159(2)               | $1-x, 1-y, 1-z$             |
| O23-H23B $\cdots$ O7  | 0.91(1)             | 1.84(1)                   | 2.738(1)                  | 169(2)               | $2-x, 2-y, 1-z$             |
| O24-H24A $\cdots$ O10 | 0.88(1)             | 2.05(1)                   | 2.981(1)                  | 159(2)               | $1-x, 2-y, 1-z$             |
| O24-H24B $\cdots$ O9  | 0.88(2)             | 2.40(2)                   | 3.165(1)                  | 146(2)               | $x, y, z$                   |
| O24-H24B $\cdots$ O10 | 0.88(2)             | 2.22(2)                   | 2.959(1)                  | 142(2)               | $x, y, z$                   |
| O25-H25A $\cdots$ O5  | 0.90(2)             | 1.88(2)                   | 2.735(1)                  | 158(2)               | $x, y, z$                   |
| O25-H25B $\cdots$ O23 | 0.88(2)             | 2.31(2)                   | 3.091(1)                  | 148(2)               | $1-x, 2-y, -z$              |
| O26-H26A $\cdots$ O22 | 0.92(2)             | 1.90(2)                   | 2.791(1)                  | 162(2)               | $1-x, 2-y, 1-z$             |
| O26-H26B $\cdots$ O11 | 0.89(2)             | 1.98(2)                   | 2.829(1)                  | 159(2)               | $-1+x, y, z$                |
| O27-H27A $\cdots$ O7  | 0.89(2)             | 2.40(2)                   | 3.151(1)                  | 142(2)               | $-1+x, y, z$                |
| O27-H27A $\cdots$ O8  | 0.89(2)             | 2.17(2)                   | 2.950(1)                  | 146(2)               | $-1+x, y, z$                |
| O27-H27B $\cdots$ O3  | 0.89(1)             | 1.97(1)                   | 2.807(1)                  | 155(2)               | $x, 1+y, 1+z$               |
| O28-H28A $\cdots$ O4  | 0.90(2)             | 2.51(2)                   | 2.941(1)                  | 110(2)               | $1-x, 2-y, 1-z$             |
| O28-H28A $\cdots$ O21 | 0.90(2)             | 2.17(2)                   | 3.035(2)                  | 163(2)               | $1-x, 2-y, 1-z$             |
| O28-H28B $\cdots$ Cl2 | 0.90(2)             | 2.54(2)                   | 3.433(1)                  | 171(2)               | $1-x, 2-y, 1-z$             |
| O28-H28B $\cdots$ O4  | 0.90(2)             | 2.54(2)                   | 2.941(1)                  | 107(1)               | $1-x, 2-y, 1-z$             |
| O29-H29A $\cdots$ O8  | 0.89(1)             | 1.90(2)                   | 2.784(1)                  | 175(1)               | $1-x, 3-y, -z$              |
| O29-H29B $\cdots$ O20 | 0.90(2)             | 1.94(2)                   | 2.834(1)                  | 179(2)               | $-1+x, 1+y, z$              |
